# Supplementary material for: High Throughput Chemical Screening Reveals Multiple Regulatory Proteins on FOXA1 in Breast Cancer Cell Lines
Source: MDPI journal article supplement (doi:10.3390/ijms19124123), 2018-12-19
Supplement: s1 [file s1]

**Table S2.** List of significant FOXA1 interacting proteins identified by FOXA1 IP and MS. Separate lists for MCF-7 or BT474 cells are shown.

**FOXA1 interacting proteins in BT474 cells**

| Protein names                                            | Gene names | Unique peptides of rep1 | Unique peptides of rep2 | Unique peptides IgG |
|----------------------------------------------------------|------------|-------------------------|-------------------------|---------------------|
| Cyclin-dependent kinase 1                                | CDK1       | 5                       | 1                       | 0                   |
| YTH domain-containing family protein 1                   | YTHDF3     | 1                       | 1                       | 0                   |
| NADH dehydrogenase (ubiquinone) complex I                | NDUFAF6    | 1                       | 1                       | 0                   |
| 28S ribosomal protein S34                                | MRPS34     | 1                       | 3                       | 0                   |
| SH3 domain-binding glutamic acid-rich-like protein 3     | SH3BGL3    | 2                       | 2                       | 0                   |
| Required for meiotic nuclear division protein 1 homolog  | RMND1      | 1                       | 1                       | 0                   |
| Vacuolar protein sorting-associated protein VTA1 homolog | VTA1       | 1                       | 1                       | 0                   |
| Transcription factor GATA-4                              | GATA4      | 2                       | 1                       | 0                   |
| Serine/arginine-rich splicing factor 7                   | SRSF7      | 2                       | 1                       | 0                   |
| Uncharacterized protein C11orf98                         | C11orf98   | 1                       | 1                       | 0                   |
| Bifunctional polynucleotide phosphatase/kinase           | PNKP       | 2                       | 1                       | 0                   |
| Pleckstrin homology domain-containing family G member 3  | PLEKHG3    | 2                       | 1                       | 0                   |
| 39S ribosomal protein L28                                | MRPL28     | 1                       | 1                       | 0                   |
| von Willebrand factor A domain-containing protein 8      | VWA8       | 2                       | 4                       | 0                   |
| Microtubule-associated proteins 1A/1B light chain 3B     | MAP1LC3B   | 2                       | 1                       | 0                   |
| Phosphorylase b kinase regulatory subunit alpha          | PHKA1      | 1                       | 1                       | 0                   |
| Heterochromatin protein 1-binding protein 3              | HP1BP3     | 1                       | 1                       | 0                   |
| Coatmer subunit delta                                    | ARCN1      | 4                       | 1                       | 0                   |
| Heterogeneous nuclear ribonucleoproteins C1/C2           | HNRNPC     | 5                       | 3                       | 0                   |
| RNA-binding protein Musashi homolog 2                    | MSI2       | 4                       | 3                       | 0                   |
| Syntenin-1                                               | SDCBP      | 1                       | 1                       | 0                   |
| Serine--tRNA ligase                                      | SARS2      | 1                       | 2                       | 0                   |
| Zinc finger CCCH-type antiviral protein 1                | ZC3HAV1    | 3                       | 1                       | 0                   |
| Integrator complex subunit 6                             | INTS6      | 1                       | 1                       | 0                   |
| DNA-directed RNA polymerases I                           | POLR2H     | 1                       | 1                       | 0                   |
| Peptidyl-prolyl cis-trans isomerase                      | PPIH       | 4                       | 1                       | 0                   |
| 60S ribosomal protein L32                                | RPL32      | 2                       | 5                       | 0                   |
| Transcription factor BTF3                                | BTF3       | 1                       | 1                       | 0                   |
| Nucleotide exchange factor SIL1                          | SIL1       | 1                       | 2                       | 0                   |
| Dynactin subunit 6                                       | DCTN6      | 1                       | 1                       | 0                   |
| Cytochrome c oxidase subunit 7A-related protein          | COX7A2L    | 1                       | 1                       | 0                   |
| Protein FAM98A                                           | FAM98A     | 1                       | 1                       | 0                   |
| 60S ribosomal protein L8                                 | RPL8       | 2                       | 2                       | 0                   |
| NADH dehydrogenase [ubiquinone] iron-sulfur protein 8    | NDUFS8     | 1                       | 1                       | 0                   |
| Protein transport protein Sec16A                         | SEC16A     | 4                       | 2                       | 0                   |
| DNA repair protein XRCC1                                 | XRCC1      | 4                       | 3                       | 0                   |
| Ubiquitin-conjugating enzyme E2 N                        | UBE2N      | 2                       | 1                       | 0                   |
| Charged multivesicular body protein 1a                   | CHMP1A     | 3                       | 2                       | 0                   |

|                                                                               |         |   |   |   |
|-------------------------------------------------------------------------------|---------|---|---|---|
| Vacuolar protein sorting-associated protein 29                                | VPS29   | 2 | 1 | 0 |
| Nesprin-3                                                                     | SYNE3   | 1 | 1 | 0 |
| 60S ribosomal protein L3                                                      | RPL3    | 3 | 3 | 0 |
| Dolichol-phosphate mannosyltransferase subunit 1                              | DPM1    | 7 | 6 | 0 |
| Receptor-type tyrosine-protein phosphatase F                                  | PTPRF   | 1 | 2 | 0 |
| Mitochondrial fission regulator 1                                             | MTFR1   | 1 | 1 | 0 |
| SRSF protein kinase 1                                                         | SRPK1   | 2 | 1 | 0 |
| 26S proteasome non-ATPase regulatory subunit 9                                | PSMD9   | 3 | 3 | 0 |
|                                                                               | ALOXE3  | 1 | 1 | 0 |
| AP-2 complex subunit sigma                                                    | AP2S1   | 2 | 2 | 0 |
| PDZ and LIM domain protein 1                                                  | PDLIM1  | 1 | 1 | 0 |
| U6 snRNA-associated Sm-like protein LSM1                                      | LSM1    | 1 | 2 | 0 |
| NADH dehydrogenase [ubiquinone] 1 alpha subcomplex subunit 2                  | NDUFA2  | 1 | 1 | 0 |
| Probable 18S rRNA (guanine-N(7))-methyltransferase                            | WBSCR22 | 1 | 1 | 0 |
| LanC-like protein 1                                                           | LANCL1  | 4 | 2 | 0 |
| Protein SCO2 homolog                                                          | SCO2    | 2 | 1 | 0 |
| Tripartite motif-containing protein 3                                         | TRIM3   | 2 | 2 | 0 |
| Vacuolar protein sorting-associated protein 26A                               | VPS26A  | 1 | 1 | 0 |
| Serine/arginine-rich splicing factor 10                                       | SRSF10  | 1 | 1 | 0 |
| Heat shock factor-binding protein 1                                           | HSBP1   | 2 | 1 | 0 |
| Barrier-to-autointegration factor                                             | BANF1   | 3 | 2 | 0 |
| Interferon-inducible double-stranded RNA-dependent protein kinase activator A | PRKRA   | 5 | 5 | 0 |
| NADH dehydrogenase [ubiquinone] 1 beta subcomplex subunit 4                   | NDUFB4  | 2 | 2 | 0 |
| Probable tRNA pseudouridine synthase 2                                        | TRUB2   | 2 | 1 | 0 |
| 2,3-cyclic-nucleotide 3-phosphodiesterase                                     | CNP     | 1 | 1 | 0 |
| Ubiquitin-like protein 4A                                                     | UBL4A   | 1 | 1 | 0 |
| Heterogeneous nuclear ribonucleoprotein L                                     | HNRNPL  | 2 | 2 | 0 |
| High mobility group protein HMG-I/HMG-Y                                       | HMGA1   | 1 | 1 | 0 |
| 60S ribosomal protein L7                                                      | RPL7    | 4 | 5 | 0 |
| Heterogeneous nuclear ribonucleoprotein H3                                    | HNRNPH3 | 1 | 1 | 0 |
| Replication protein A 14 kDa subunit                                          | RPA3    | 2 | 1 | 0 |
| Replication factor C subunit 4                                                | RFC4    | 5 | 4 | 0 |
| 60S ribosomal protein L13a                                                    | RPL13A  | 2 | 2 | 0 |
| 60S ribosomal protein L28                                                     | RPL28   | 6 | 5 | 0 |
| 60S ribosomal protein L34                                                     | RPL34   | 1 | 2 | 0 |
| Hepatocyte nuclear factor 3-alpha                                             | FOXA1   | 9 | 8 | 0 |
| 60S ribosomal protein L27                                                     | RPL27   | 4 | 4 | 0 |
| DDB1- and CUL4-associated factor 7                                            | DCAF7   | 6 | 2 | 0 |
| WD repeat-containing protein 5                                                | WDR5    | 5 | 6 | 0 |
| 40S ribosomal protein S8                                                      | RPS8    | 5 | 5 | 0 |
| DNA-directed RNA polymerases I                                                | POLR2L  | 2 | 2 | 0 |
| Putative 60S ribosomal protein L39-like 5                                     | RPL39P5 | 1 | 1 | 0 |

|                                                                         |          |   |   |   |
|-------------------------------------------------------------------------|----------|---|---|---|
| Growth factor receptor-bound protein 2                                  | GRB2     | 3 | 1 | 0 |
| Transformer-2 protein homolog beta                                      | TRA2B    | 2 | 1 | 0 |
| 28S ribosomal protein S6                                                | MRPS6    | 2 | 2 | 0 |
| Transcription factor A                                                  | TFAM     | 5 | 3 | 0 |
| Serine/arginine-rich splicing factor 9                                  | SRSF9    | 3 | 3 | 0 |
| SNW domain-containing protein 1                                         | SNW1     | 2 | 1 | 0 |
| ELAV-like protein 1                                                     | ELAVL1   | 7 | 1 | 0 |
| Myeloid leukemia factor 2                                               | MLF2     | 2 | 1 | 0 |
| Mitochondrial import receptor subunit TOM34                             | TOMM34   | 4 | 4 | 0 |
| UDP-N-acetylhexosamine pyrophosphorylase                                | UAP1     | 1 | 1 | 0 |
| WD40 repeat-containing protein SMU1                                     | SMU1     | 4 | 3 | 0 |
| PDZ domain-containing protein 11                                        | PDZD11   | 2 | 1 | 0 |
| Cancer-related nucleoside-triphosphatase                                | NTPCR    | 1 | 2 | 0 |
| Pleckstrin homology domain-containing family A member 6                 | PLEKHA6  | 2 | 1 | 0 |
| Ankyrin repeat domain-containing protein 22                             | ANKRD22  | 1 | 1 | 0 |
| Tetratricopeptide repeat protein 19                                     | TTC19    | 3 | 3 | 0 |
| 39S ribosomal protein L54                                               | MRPL54   | 1 | 1 | 0 |
| 2-oxoglutarate and iron-dependent oxygenase domain-containing protein 3 | OGFOD3   | 1 | 1 | 0 |
| Dehydrogenase/reductase SDR family member 13                            | DHRS13   | 1 | 1 | 0 |
| WD repeat-containing protein 82                                         | WDR82    | 2 | 2 | 0 |
| Charged multivesicular body protein 1b                                  | CHMP1B   | 2 | 2 | 0 |
| DnaJ homolog subfamily C member 10                                      | DNAJC10  | 6 | 7 | 0 |
| Activating signal cointegrator 1 complex subunit 1                      | ASCC1    | 3 | 1 | 0 |
| ATPase family AAA domain-containing protein 1                           | ATAD1    | 2 | 1 | 0 |
| UDP-glucuronic acid decarboxylase 1                                     | UXS1     | 1 | 1 | 0 |
| LEM domain-containing protein 2                                         | LEMD2    | 4 | 3 | 0 |
| Deleted in autism protein 1                                             | C3orf58  | 2 | 1 | 0 |
| Alpha/beta hydrolase domain-containing protein 11                       | ABHD11   | 6 | 5 | 0 |
| Phosphatidylglycerophosphatase and protein-tyrosine phosphatase 1       | PTPMT1   | 4 | 2 | 0 |
| Dimethyladenosine transferase 1                                         | TFB1M    | 1 | 1 | 0 |
| Ataxin-2-like protein                                                   | ATXN2L   | 3 | 2 | 0 |
| 5-methylcytosine rRNA methyltransferase NSUN4                           | NSUN4    | 2 | 2 | 0 |
| Coiled-coil domain-containing protein 124                               | CCDC124  | 1 | 1 | 0 |
| Pentatricopeptide repeat domain-containing protein 3                    | PTCD3    | 2 | 1 | 0 |
| Bcl10-interacting CARD protein                                          | C9orf89  | 2 | 5 | 0 |
| Zinc finger protein 385A                                                | ZNF385A  | 2 | 2 | 0 |
| Protein S100-A13                                                        | S100A13  | 2 | 1 | 0 |
| Evolutionarily conserved signaling intermediate in Toll pathway         | ECSIT    | 4 | 1 | 0 |
| Dehydrogenase/reductase SDR family member 4                             | DHRS4    | 2 | 2 | 0 |
| HIG1 domain family member 2A                                            | HIGD2A   | 1 | 1 | 0 |
| Uncharacterized protein KIAA1671                                        | KIAA1671 | 3 | 5 | 0 |
| Phosducin-like protein 3                                                | PDCL3    | 3 | 1 | 0 |

|                                                                             |          |   |   |   |
|-----------------------------------------------------------------------------|----------|---|---|---|
| <b>LYR motif-containing protein 4</b>                                       | LYRM4    | 2 | 2 | 0 |
| <b>PDZ and LIM domain protein 7</b>                                         | PDLIM7   | 2 | 2 | 0 |
| <b>Protein FAM207A</b>                                                      | FAM207A  | 2 | 2 | 0 |
| <b>H/ACA ribonucleoprotein complex subunit 1</b>                            | GAR1     | 2 | 1 | 0 |
| <b>NADH dehydrogenase [ubiquinone] 1 alpha subcomplex assembly factor 4</b> | NDUFAF4  | 4 | 3 | 0 |
| <b>Cytochrome b-c1 complex subunit 9</b>                                    | UQCR10   | 2 | 2 | 0 |
| <b>NADH dehydrogenase [ubiquinone] 1 alpha subcomplex subunit 12</b>        | NDUFA12  | 4 | 1 | 0 |
| <b>Dynactin subunit 4</b>                                                   | DCTN4    | 2 | 2 | 0 |
| <b>mRNA turnover protein 4 homolog</b>                                      | MRT04    | 4 | 2 | 0 |
| <b>Protein kinase C and casein kinase substrate in neurons protein 2</b>    | PACSIN2  | 2 | 1 | 0 |
| <b>Probable dimethyladenosine transferase</b>                               | DIMT1    | 1 | 2 | 0 |
| <b>Leydig cell tumor 10 kDa protein homolog</b>                             | C19orf53 | 2 | 3 | 0 |
| <b>39S ribosomal protein L11</b>                                            | MRPL11   | 6 | 5 | 0 |
| <b>Peptidyl-prolyl cis-trans isomerase-like 1</b>                           | PPIL1    | 2 | 4 | 0 |
| <b>Mitochondrial fission 1 protein</b>                                      | FIS1     | 1 | 1 | 0 |
| <b>60S ribosomal protein L36</b>                                            | RPL36    | 4 | 3 | 0 |
| <b>U6 snRNA-associated Sm-like protein LSM4</b>                             | LSM4     | 1 | 1 | 0 |

## FOXA1 interacting proteins in MCF7 cells

| <b>Protein namesProtein names</b>                              | <b>Gene names</b> | <b>Unique peptides of rep1</b> | <b>Unique peptides of rep2</b> | <b>Unique peptides IgG</b> |
|----------------------------------------------------------------|-------------------|--------------------------------|--------------------------------|----------------------------|
| <b>28S ribosomal protein S34</b>                               | MRPS34            | 1                              | 1                              | 0                          |
| <b>Required for meiotic nuclear division protein 1 homolog</b> | RMND1             | 1                              | 2                              | 0                          |
| <b>DDRKG domain-containing protein 1</b>                       | DDRKG1            | 1                              | 1                              | 0                          |
| <b>Coronin</b>                                                 | PAM16             | 2                              | 1                              | 0                          |
| <b>40S ribosomal protein S15</b>                               | RPS15             | 4                              | 3                              | 0                          |
| <b>Dehydrogenase/reductase SDR family member 7B</b>            | DHRS7B            | 2                              | 2                              | 0                          |
| <b>Vacuolar protein sorting-associated protein 37C</b>         | VPS37C            | 2                              | 1                              | 0                          |
| <b>Protein PBDC1</b>                                           | PBDC1             | 1                              | 1                              | 0                          |
| <b>Non-histone chromosomal protein HMG-14</b>                  | HMGN1             | 1                              | 1                              | 0                          |
| <b>Tuftelin</b>                                                | TUFT1             | 1                              | 1                              | 0                          |
| <b>Small nuclear ribonucleoprotein G</b>                       | SNRPG             | 1                              | 1                              | 0                          |
| <b>NHP2-like protein 1</b>                                     | NHP2L1            | 1                              | 1                              | 0                          |
| <b>Lymphocyte function-associated antigen 3</b>                | CD58              | 1                              | 1                              | 0                          |
| <b>Heterogeneous nuclear ribonucleoproteins C1/C2</b>          | HNRNPC            | 2                              | 2                              | 0                          |
| <b>RNA-binding protein Musashi homolog 2</b>                   | MSI2              | 3                              | 2                              | 0                          |
| <b>Eukaryotic translation initiation factor 4E type 2</b>      | EIF4E2            | 1                              | 1                              | 0                          |
| <b>RNA-binding protein with multiple splicing</b>              | RBPMS             | 3                              | 2                              | 0                          |
| <b>Charged multivesicular body protein 2b</b>                  | CHMP2B            | 1                              | 1                              | 0                          |
| <b>DNA-directed RNA polymerases I</b>                          | POLR2H            | 1                              | 1                              | 0                          |

|                                                                               |          |    |    |   |
|-------------------------------------------------------------------------------|----------|----|----|---|
| Uncharacterized protein C7orf50                                               | C7orf50  | 2  | 5  | 0 |
| CGG triplet repeat-binding protein 1                                          | CGGBP1   | 1  | 1  | 0 |
| 60S ribosomal protein L22-like 1                                              | RPL22L1  | 1  | 2  | 0 |
| Transmembrane protein 33                                                      | TMEM33   | 1  | 1  | 0 |
| Uncharacterized protein C1orf198                                              | C1orf198 | 1  | 1  | 0 |
| Centrin-3                                                                     | CETN3    | 1  | 1  | 0 |
| Transforming acidic coiled-coil-containing protein 2                          | TACC2    | 15 | 19 | 0 |
| 60S ribosomal protein L14                                                     | RPL14    | 3  | 3  | 0 |
| RNA-binding motif                                                             | RBMS1    | 2  | 1  | 0 |
| Selenoprotein S                                                               | VIMP     | 1  | 1  | 0 |
| Midkine                                                                       | MDK      | 1  | 1  | 0 |
| G-rich sequence factor 1                                                      | GRSF1    | 1  | 1  | 0 |
| DNA repair protein XRCC1                                                      | XRCC1    | 2  | 2  | 0 |
| Charged multivesicular body protein 1a                                        | CHMP1A   | 3  | 2  | 0 |
| SWI/SNF complex subunit SMARCC2                                               | SMARCC2  | 1  | 1  | 0 |
| 60S ribosomal protein L3                                                      | RPL3     | 2  | 1  | 0 |
| Dolichol-phosphate mannosyltransferase subunit 1                              | DPM1     | 1  | 2  | 0 |
| Histone deacetylase                                                           | HDAC7    | 1  | 1  | 0 |
| Rab-3A-interacting protein                                                    | RAB3IP   | 1  | 1  | 0 |
| Synaptosomal-associated protein                                               | SNAP23   | 2  | 1  | 0 |
| Transcription factor 25                                                       | TCF25    | 1  | 1  | 0 |
| 26S proteasome non-ATPase regulatory subunit 9                                | PSMD9    | 2  | 1  | 0 |
| Mitochondrial inner membrane protein OXA1L                                    | OXA1L    | 1  | 1  | 0 |
| 60S ribosomal protein L36a                                                    | RPL36A   | 3  | 2  | 0 |
| Transmembrane and coiled-coil domain-containing protein 1                     | TMCO1    | 2  | 1  | 0 |
| Protein FAM32A                                                                | FAM32A   | 1  | 1  | 0 |
| DAZ-associated protein 1                                                      | DAZAP1   | 2  | 1  | 0 |
| PIH1 domain-containing protein 1                                              | PIH1D1   | 1  | 1  | 0 |
| Centrosomal protein of 290 kDa                                                | CEP290   | 1  | 1  | 0 |
| Mitochondrial ribonuclease P protein 3                                        | KIAA0391 | 5  | 4  | 0 |
| Protein regulator of cytokinesis 1                                            | PRC1     | 1  | 1  | 0 |
| PC4 and SFRS1-interacting protein                                             | PSIP1    | 1  | 2  | 0 |
| Interferon-inducible double-stranded RNA-dependent protein kinase activator A | PRKRA    | 7  | 5  | 0 |
| Zinc finger protein-like 1                                                    | ZFPL1    | 1  | 1  | 0 |
| NADH dehydrogenase [ubiquinone] 1 beta subcomplex subunit 4                   | NDUFB4   | 1  | 1  | 0 |
| NADH dehydrogenase [ubiquinone] 1 alpha subcomplex subunit 7                  | NDUFA7   | 1  | 1  | 0 |
| CD2 antigen cytoplasmic tail-binding protein 2                                | CD2BP2   | 1  | 1  | 0 |
| BAG family molecular chaperone regulator 2                                    | BAG2     | 1  | 2  | 0 |
| Cytochrome b-c1 complex subunit 6                                             | UQCRH    | 4  | 5  | 0 |
| Chromosome transmission fidelity protein 8 homolog isoform 2                  | CHTF8    | 4  | 3  | 0 |
| Myosin-6                                                                      | MYH6     | 1  | 0  | 0 |
| Heterogeneous nuclear ribonucleoprotein L                                     | HNRNPL   | 1  | 1  | 0 |

|                                                               |          |   |    |   |
|---------------------------------------------------------------|----------|---|----|---|
| High mobility group protein HMG-I/HMG-Y                       | HMGA1    | 2 | 1  | 0 |
| 60S ribosomal protein L7                                      | RPL7     | 3 | 5  | 0 |
| ATP synthase-coupling factor 6                                | ATP5J    | 3 | 2  | 0 |
| RNA-binding motif protein                                     | RBMX     | 3 | 4  | 0 |
| Replication factor C subunit 5                                | RFC5     | 4 | 5  | 0 |
| 60S ribosomal protein L21                                     | RPL21    | 4 | 4  | 0 |
| IST1 homolog                                                  | IST1     | 2 | 2  | 0 |
| Atrophin-1                                                    | ATN1     | 1 | 1  | 0 |
| Hepatocyte nuclear factor 3-alpha                             | FOXA1    | 9 | 10 | 0 |
| DNA-directed RNA polymerases I                                | POLR2L   | 1 | 1  | 0 |
| 40S ribosomal protein S21                                     | RPS21    | 2 | 1  | 0 |
| mRNA export factor                                            | RAE1     | 1 | 1  | 0 |
| 28S ribosomal protein S10                                     | MRPS10   | 1 | 1  | 0 |
| 28S ribosomal protein S35                                     | MRPS35   | 2 | 2  | 0 |
| Serine/arginine-rich splicing factor 3                        | SRSF3    | 5 | 3  | 0 |
| RNA-binding protein 3                                         | RBM3     | 2 | 2  | 0 |
| Transcription factor A                                        | TFAM     | 1 | 1  | 0 |
| Lactadherin                                                   | MFGE8    | 1 | 2  | 0 |
| Nuclear cap-binding protein subunit 1                         | NCBP1    | 2 | 4  | 0 |
| Serine/arginine-rich splicing factor 9                        | SRSF9    | 2 | 2  | 0 |
| SNW domain-containing protein 1                               | SNW1     | 2 | 1  | 0 |
| E3 ubiquitin/ISG15 ligase TRIM25                              | TRIM25   | 1 | 1  | 0 |
| ELAV-like protein 1                                           | ELAVL1   | 3 | 2  | 0 |
| WD40 repeat-containing protein SMU1                           | SMU1     | 1 | 1  | 0 |
| Mitochondrial import inner membrane translocase subunit TIM50 | TIMM50   | 2 | 2  | 0 |
| 39S ribosomal protein L54                                     | MRPL54   | 1 | 1  | 0 |
| WD repeat-containing protein 82                               | WDR82    | 2 | 1  | 0 |
| Heparan sulfate 2-O-sulfotransferase 1                        | HS2ST1   | 1 | 1  | 0 |
| PHD finger-like domain-containing protein 5A                  | PHF5A    | 1 | 1  | 0 |
| Protein MON2 homolog                                          | MON2     | 4 | 6  | 0 |
| Testis-specific Y-encoded-like protein 5                      | TSPYL5   | 1 | 1  | 0 |
| MICAL-like protein 2                                          | MICALL2  | 3 | 4  | 0 |
| Uncharacterized protein KIAA1958                              | KIAA1958 | 1 | 1  | 0 |
| LEM domain-containing protein 2                               | LEMD2    | 2 | 2  | 0 |
| DnaJ homolog subfamily C member 9                             | DNAJC9   | 3 | 4  | 0 |
| Zinc finger protein 385A                                      | ZNF385A  | 1 | 2  | 0 |
| Plakophilin-2                                                 | PKP2     | 1 | 1  | 0 |
| Melanophilin                                                  | MLPH     | 1 | 1  | 0 |
| 5-3 exoribonuclease 2                                         | XRN2     | 2 | 1  | 0 |
| Charged multivesicular body protein 4b                        | CHMP4B   | 1 | 1  | 0 |
| Vacuolar protein sorting-associated protein 37B               | VPS37B   | 1 | 1  | 0 |
| Protein FAM207A                                               | FAM207A  | 3 | 4  | 0 |
| NADH dehydrogenase [ubiquinone] 1 alpha subcomplex subunit 12 | NDUFA12  | 3 | 2  | 0 |

|                                                                      |          |   |   |   |
|----------------------------------------------------------------------|----------|---|---|---|
| <b>SH3 domain-binding glutamic acid-rich-like protein 2</b>          | SH3BGRL2 | 2 | 1 | 0 |
| <b>Heat shock protein beta-8</b>                                     | HSPB8    | 1 | 2 | 0 |
| <b>mRNA turnover protein 4 homolog</b>                               | MRT04    | 4 | 4 | 0 |
| <b>Leydig cell tumor 10 kDa protein homolog</b>                      | C19orf53 | 1 | 1 | 0 |
| <b>28S ribosomal protein S28</b>                                     | MRPS28   | 1 | 1 | 0 |
| <b>Thyroid hormone receptor-associated protein 3</b>                 | THRAP3   | 5 | 6 | 0 |
| <b>28S ribosomal protein S2</b>                                      | MRPS2    | 1 | 1 | 0 |
| <b>Splicing factor 3B subunit 6</b>                                  | SF3B6    | 1 | 1 | 0 |
| <b>39S ribosomal protein L11</b>                                     | MRPL11   | 5 | 3 | 0 |
| <b>Peptidyl-prolyl cis-trans isomerase-like 1</b>                    | PPIL1    | 2 | 2 | 0 |
| <b>Mitochondrial import inner membrane translocase subunit Tim13</b> | TIMM13   | 1 | 1 | 0 |
| <b>DnaJ homolog subfamily C member 15</b>                            | DNAJC15  | 1 | 1 | 0 |
