# Supplementary material for: High Throughput Chemical Screening Reveals Multiple Regulatory Proteins on FOXA1 in Breast Cancer Cell Lines
Source: Int J Mol Sci. 2018 Dec 19;19(12):4123. doi: 10.3390/ijms19124123 (PMC6321185; doi:10.3390/ijms19124123)
Supplement: Supplementary file 1 [file ijms-19-04123-s001.zip › Supplementary Table S1.xlsx]

## Sheet: Description-Mode of action
Table S1. List of compounds used for the first drug screening.
Enzo: Library of compounds			Enzo: Library of compounds			Enzo: Library of compounds			Enzo: Library of compounds			Enzo: Library of compounds			Enzo: Library of compounds
Library	Nameof the compound	Description/Mode of action	Library	Nameof the compound	Description/Mode of action	Library	Nameof the compound	Description/Mode of action	Library	Nameof the compound	Description/Mode of action	Library	Nameof the compound	Description/Mode of action	Library	Nameof the compound	Description/Mode of action
REDOX	Promethazine·HCl	Unknown	Epigenetics library	Trichostatin A	HDAC inhibitor	Autophagy inducers library	A23187	ER stress	Nuclear Receptor Ligand Library	GW 9662	PPARg antagonist	Ion channel ligand library	Penitrem A	Potassium channel	Phosphatase Inhibitor Library	Cantharidic acid	PP1 and PP2A
REDOX	Cumene hydroperoxide	Aryl hydroperoxide	Epigenetics library	2,4-Pyridinedicarboxylic Acid	Histone demethylase inhibitor	Autophagy inducers library	Capsaicin	ER stress/p38,ERK inhib	Nuclear Receptor Ligand Library	Gemfibrozil	PPARa agonist	Ion channel ligand library	Tolazamide	Potassium channel	Phosphatase Inhibitor Library	Cantharidin	PP1 and PP2A
REDOX	β-Lapachone	Undergoes futile redox cycles	Epigenetics library	Garcinol	HAT inhibitor	Autophagy inducers library	Dihydrocapsaicin	ROS accumulation	Nuclear Receptor Ligand Library	GW 7647	PPARa agonist	Ion channel ligand library	NS-1619	Potassium channel	Phosphatase Inhibitor Library	Endothall	PP2A
REDOX	Resveratrol	Stilbene phenolic antioxidant	Epigenetics library	Splitomicin	SIRT-2 inhibitor	Autophagy inducers library	Glucosamine HCl	mTOR	Nuclear Receptor Ligand Library	3,5-Diiodo-L-thyronine	THR agonist	Ion channel ligand library	ZM226600	Potassium channel	Phosphatase Inhibitor Library	Benzylphosphonic acid	Tyrosine phosphatases
REDOX	Hydroquinone	Phenolic antioxidant	Epigenetics library	BML-210	HDAC inhibitor	Autophagy inducers library	DTT	ER stress inducer/lysosome degrad. Inhib.	Nuclear Receptor Ligand Library	3,5-Diiodo-L-tyrosine	THR congener	Ion channel ligand library	AM 92016	Potassium channel	Phosphatase Inhibitor Library	L-p-Bromotetramisole oxalate	Tyrosine phosphatases
REDOX	TEMPOL	SOD mimetic	Epigenetics library	Apicidin	HDAC inhibitor	Autophagy inducers library	Deoxycholate·Na	↑Beclin1 via ER stress/DNA damage	Nuclear Receptor Ligand Library	all-trans-Retinol	Retinoid	Ion channel ligand library	Fluspirilene	Potassium channel	Phosphatase Inhibitor Library	RK-682	Tyrosine phosphatases
REDOX	Ferulic acid ethylester	Phenolic antioxidant	Epigenetics library	Suberoyl bis-hydroxamic acid	HDAC inhibitor	Autophagy inducers library	ABC294640·HCl	SK2 inhib.	Nuclear Receptor Ligand Library	13-cis-Retinol	Retinoid	Ion channel ligand library	Minoxidil	Potassium channel	Phosphatase Inhibitor Library	RWJ-60475	CD45 tyrosine phosphatase
REDOX	D-α-Tocopherylquinone	Oxidized vitamin E	Epigenetics library	Scriptaid	HDAC inhibitor	Autophagy inducers library	Licochalcone A	Bcl-2/mTOR inhib.	Nuclear Receptor Ligand Library	Retinyl acetate	Retinoid	Ion channel ligand library	Tolbutamide	Potassium channel	Phosphatase Inhibitor Library	RWJ-60475 (AM)3	CD45 tyrosine phosphatase (cell permeable)
REDOX	Seratrodast	Quinone antioxidant	Epigenetics library	Nullscript	Scriptaid Neg control	Autophagy inducers library	Curcumin	Akt/mTOR/S6K path inhib.	Nuclear Receptor Ligand Library	3,5-Diiodo-4-hydroxyphenylpropionic acid	THR agonist	Ion channel ligand library	Pinacidil H2O	Potassium channel	Phosphatase Inhibitor Library	Levamisole HCl	Mammalian alkaline phosphatase
REDOX	Idebenone	Quinone antioxidant	Epigenetics library	5-Aza-2'-deoxycytidine	DNA Me transferase inhibitor	Autophagy inducers library	Plumbagin	Akt/mTOR inhib.	Nuclear Receptor Ligand Library	Cholic acid	FXR agonist	Ion channel ligand library	4-Aminopyridine	Potassium channel	Phosphatase Inhibitor Library	Tetramisole HCl	Mammalian alkaline phosphatase
REDOX	tert-Butylhydroquinone	Phenolic antioxidant	Epigenetics library	Zebularine	DNA Me transferase inhibitor	Autophagy inducers library	6-Gingerol	ROS induction	Nuclear Receptor Ligand Library	Deoxycholic acid	FXR agonist	Ion channel ligand library	Glipizide	Potassium channel	Phosphatase Inhibitor Library	Cypermethrin	Calcineurin (PP2B)
REDOX	HBED·HCl·H2O	Metal chelator	Epigenetics library	SAHA	HDAC inhibitor	Autophagy inducers library	Akt Inhibitor X·HCl	Akt Inhibitor	Nuclear Receptor Ligand Library	Chenodeoxycholic acid	FXR agonist	Ion channel ligand library	Phentolamine HCl	Potassium channel	Phosphatase Inhibitor Library	Deltamethrin	Calcineurin (PP2B)
REDOX	Ambroxol	Nonphenolic antioxidant	Epigenetics library	Isonicotinamide	nicotinamide antagonist	Autophagy inducers library	PMSF	Protease Inhibitor	Nuclear Receptor Ligand Library	Glycocholic acid	Cholesterol metabolite	Ion channel ligand library	Quinine HCl 2H2O	Potassium channel	Phosphatase Inhibitor Library	Fenvalerate	Calcineurin (PP2B)
REDOX	L-Ergothioneine	Endogenous antioxidant	Epigenetics library	ITSA-1	Inhibitor of TSA activity	Autophagy inducers library	MG132	Proteasome inhibitor	Nuclear Receptor Ligand Library	Glycodeoxycholic acid	Cholesterol metabolite	Ion channel ligand library	Flufenamic acid	Potassium channel	Phosphatase Inhibitor Library	Tyrphostin 8	Calcineurin (PP2B)
REDOX	Hinokitiol	Metal chelator	Epigenetics library	Phenylbutyrate·Na	HDAC inhibitor	Autophagy inducers library	ALLN	Proteasome inhibitor	Nuclear Receptor Ligand Library	Taurocholic acid	Cholesterol metabolite	Ion channel ligand library	Propafenone	Potassium channel	Phosphatase Inhibitor Library	CinnGel	PTP1B
REDOX	Epigallocatechin gallate	Polyphenol	Epigenetics library	Tranylcypromine hemisulfate	Lysine demethylase inhibitor	Autophagy inducers library	7-Ketocholesterol	Mitochondrial stress	Nuclear Receptor Ligand Library	Taurodeoxycholic acid	Cholesterol metabolite	Ion channel ligand library	QX-314 bromide	Sodium channel	Phosphatase Inhibitor Library	NSC-95397	Cdc25
REDOX	Procysteine	Glutathione precursor	Epigenetics library	Valproic acid	HDAC inhibitor	Autophagy inducers library	17-AAG	Hsp90 inhibitor	Nuclear Receptor Ligand Library	Rifampicin	PXR agonist	Ion channel ligand library	SDZ-201106	Sodium channel	Phosphatase Inhibitor Library	BN-82002	Unknown
REDOX	Trolox	Short-chain vitamin E analog	Epigenetics library	EX-527	SIRT1 inhibitor	Autophagy inducers library	Geldanamycin	Hsp90 inhibitor	Nuclear Receptor Ligand Library	Dexamethasone	GR agonist	Ion channel ligand library	Veratridine	Sodium channel	Phosphatase Inhibitor Library	Shikonin	Unknown
REDOX	MCI-186	Nonphenolic antioxidant	Epigenetics library	Resveratrol	SIRT1 activator	Autophagy inducers library	C1	ROS/non-Beclin1 dependent	Nuclear Receptor Ligand Library	Lithocholic acid	Cholesterol metabolite	Ion channel ligand library	Phenytoin	Sodium channel	Phosphatase Inhibitor Library	NSC-663284	CDC25
REDOX	U83836E·2HCl	Antioxidant Lazaroid	Epigenetics library	M-344	HDAC inhibitor	Autophagy inducers library	Z36	Bcl-XL inhibitor	Nuclear Receptor Ligand Library	5b-Pregnan-3,20-dione	PXR agonist	Ion channel ligand library	Grayanotoxin III	Sodium channel	Phosphatase Inhibitor Library	Cyclosporin A	Calcineurin (PP2B)
REDOX	U74389G maleate	Antioxidant Lazaroid	Epigenetics library	Nicotinamide	SIRT inhibitor	Autophagy inducers library	Rockout	Rho kinase Inhibitor	Nuclear Receptor Ligand Library	Adapalene	Retinoic acid analog	Ion channel ligand library	Aconitine	Sodium channel	Phosphatase Inhibitor Library	Pentamidine	PRL1
REDOX	GERI-BP002A	Phenolic antioxidant	Epigenetics library	BML-266	SIRT2 inhibitor	Autophagy inducers library	Go6850	PKC Inhibitor	Nuclear Receptor Ligand Library	Farnesol	Farnesoid	Ion channel ligand library	Procainamide·HCl	Sodium channel	Phosphatase Inhibitor Library	BVT-948	Tyrosine phosphatases
REDOX	Apigenin	Flavone antioxidant	Epigenetics library	Piceatannol	SIRT activator	Autophagy inducers library	2-Deoxyglucose	Blocks glycolysis	Nuclear Receptor Ligand Library	3a, 5a-Androstenol	CAR inverse agonist	Ion channel ligand library	Lidocaine·HCl·H2O	Sodium channel	Phosphatase Inhibitor Library	B4-Rhodanine	PRL3
REDOX	Terbinafine·HCl	Free radical quencher	Epigenetics library	Fluoro-SAHA	HDAC inhibitor	Autophagy inducers library	Etoposide	Topoisomerase II Inhibitor	Nuclear Receptor Ligand Library	3α, 5α-Androstanol	CAR inverse agonist	Ion channel ligand library	Quinidine·HCl·H2O	Sodium channel	Phosphatase Inhibitor Library	Alexidine·2HCl	PTPMT1
REDOX	Rosmarinic acid	Phenolic antioxidant	Epigenetics library	Valproic acid hydroxamate	HDAC inhibitor	Autophagy inducers library	SMER28	Increases autophagosome clearance independent of mTOR	Nuclear Receptor Ligand Library	Z-Guggulsterone	FXR antagonist	Ion channel ligand library	Flecainide acetate	Sodium channel	Phosphatase Inhibitor Library	9,10-Phenanthrenequinone	CD45 tyrosine phosphatase
REDOX	Piceatannol	Stilbene phenolic antioxidant	Epigenetics library	AGK2	SIRT2 inhibitor	Autophagy inducers library	Trehalose	Increases Beclin-1 and autophagins independent of mTOR	Nuclear Receptor Ligand Library	TCPOBOP	CAR agonist	Ion channel ligand library	Phenamil	Sodium channel	Phosphatase Inhibitor Library	BML-260	JSP-1
REDOX	AA-861	Quinone antioxidant	Epigenetics library	Salermide	SIRT inhibitor	Autophagy inducers library	C2-dihydroceramide	Induces formation of autophagosomes	Nuclear Receptor Ligand Library	N-Oleoylethanolamide	PPARa agonist	Ion channel ligand library	IAA-94	Misc. channel	Phosphatase Inhibitor Library	Sanguinarine chloride	PP2C
REDOX	CDC	Phenolic antioxidant	Epigenetics library	MC-1293	HDAC inhibitor	Autophagy inducers library	Temozolomide	Localizes LC3 to autophagosomes	Nuclear Receptor Ligand Library	GW4064	FXR agonist	Ion channel ligand library	NPPB	Misc. channel	Phosphatase Inhibitor Library	BML-267	PTP1B
REDOX	Ebselen	Glutathione peroxidase mimetic	Epigenetics library	Anacardic acid	HAT inhibitor	Autophagy inducers library	Resveratrol	Inhibits S6 kinase	Nuclear Receptor Ligand Library	Geranylgeraniol	Farnesoid	Ion channel ligand library	Fipronil	Misc. channel	Phosphatase Inhibitor Library	BML-267 Ester	PTP1B (cell permeable)
REDOX	Genistein	Isoflavone antioxidant	Epigenetics library	B2	SIRT2 inhibitor	Autophagy inducers library	Staurosporine	Apoptosis control	Nuclear Receptor Ligand Library	6a-Fluorotestosterone	TR agonist	Ion channel ligand library	N-phenylanthranilic acid	Misc. channel	Phosphatase Inhibitor Library	OBA	Tyrosine phosphatases
REDOX	Curcumin	Phenolic antioxidant	Epigenetics library	BIX-01294	Histone methyl transferase inhibitor	Autophagy inhibitors library	Bafilomycin A1	V-ATPase inhib	Nuclear Receptor Ligand Library	Tamoxifen	ER antagonist	Ion channel ligand library	Amantidine·HCl	Misc. channel	Phosphatase Inhibitor Library	OBA Ester	Tyrosine phosphatases (cell permeable)
REDOX	Phenidone	Nonphenolic antioxidant	Epigenetics library	Butyrolactone 3	HAT inhibitor	Autophagy inhibitors library	3-Methyladenine	PI3K inhib	Nuclear Receptor Ligand Library	Mifepristone	PR antagonist	Ion channel ligand library	Niflumic acid	Misc. channel	Phosphatase Inhibitor Library	Gossypol	Calcineurin (PP2B)
REDOX	Gossypol	Phenolic antioxidant	Epigenetics library	CTPB	HAT inhibitor	Autophagy inhibitors library	LY294002	PI3K inhib	Nuclear Receptor Ligand Library	Estrone	ER agonist	Protease Inhibitor Library	Calpain Inhibitor II (ALLM)	Calpain; Cathepsins L, B	Phosphatase Inhibitor Library	Alendronate	Tyrosine phosphatases
REDOX	Gentisic acid	Phenolic antioxidant	Epigenetics library	Oxamflatin	HDAC inhibitor	Autophagy inhibitors library	Wortmannin	PI3K inhib	Nuclear Receptor Ligand Library	13(S)-Hydroxy-9Z,11E-octadecadienoic acid	PPARg agonist	Protease Inhibitor Library	Calpeptin	Calpain; Cathepsin L	Wnt Activators Library	Foxy-5	Agonist
REDOX	Caffeic acid	Phenolic antioxidant	Epigenetics library	Sirtinol	SIRT inhibitor	Autophagy inhibitors library	SP600125	JNK inhib.	Nuclear Receptor Ligand Library	Cortisone	GR agonist	Protease Inhibitor Library	E-64	Calpain; Cathepsins; Papain	Wnt Activators Library	Anandamide	Activator
REDOX	Baicalein	Flavone antioxidant	Epigenetics library	Suramin·6Na	SIRT1 inhibitor	Autophagy inhibitors library	Chloroquine	Lysosomes (pH ↑)	Nuclear Receptor Ligand Library	Progesterone	PR agonist	Protease Inhibitor Library	E-64-C	Calpain; Cathepsins; Papain	Wnt Activators Library	QS-11	Inhibitor
REDOX	Esculetin	Coumarin antioxidant	Epigenetics library	BML-278	SIRT1 actvator	Autophagy inhibitors library	Hydroxychloroquine	Lysosomes (pH ↑)	Nuclear Receptor Ligand Library	17b-Estradiol	ER agonist	Protease Inhibitor Library	E-64-d	Calpain; Cathepsins	Wnt Activators Library	Diarylsulfonesulfonamide	Inhibitor
REDOX	N-Propyl gallate	Phenolic antioxidant	Epigenetics library	NCH-51	HDAC inhibitor	Autophagy inhibitors library	Norclomipramine·HCl	Lysosomes (pH ↑)	Nuclear Receptor Ligand Library	Pregnenolone	Progesterone precursor	Protease Inhibitor Library	MDL-28170	Calpain; Cathepsin B	Wnt Activators Library	IQ1	Activator
REDOX	ETYA	Acetylenic antioxidant	Epigenetics library	CI-994	HDAC inhibitor	Autophagy inhibitors library	(±)Bay K8644	L-type Ca2+ agonist	Nuclear Receptor Ligand Library	Androstenedione	Testosterone precursor	Protease Inhibitor Library	Z-Leu-Leu-CHO	Calpain	Wnt Activators Library	SB-216763	Inhibitor
REDOX	CAPE	Phenolic antioxidant	Epigenetics library	NSC-3852	HDAC inhibitor	Autophagy inhibitors library	Forskolin	adenylyl cyclase activator	Nuclear Receptor Ligand Library	1a,25-Dihydroxyvitamin D3	VDR agonist	Protease Inhibitor Library	CA-074	Cathepsin B	Wnt Activators Library	BIO	Inhibitor
REDOX	NDGA	Phenolic antioxidant	Epigenetics library	Aminoresveratrol sulfate	SIRT1 activator	Autophagy inhibitors library	Dibutyryl cAMP·Na	cAMP agonist	Nuclear Receptor Ligand Library	Docosa-4Z,7Z,10Z,13Z,16Z,19Z-hexaenoic acid	RXR / FXR agonist	Protease Inhibitor Library	CA-074 Me	Cathepsin B	Wnt Activators Library	TWS-119	Inhibitor
REDOX	Capsaicin	Phenolic antioxidant	Epigenetics library	BML-281	HDAC-6 inhibitor	Autophagy inhibitors library	Rolipram	PDE4 Inhibitor(↑cAMP)	Nuclear Receptor Ligand Library	3-Methylcholanthrene	AHR agonist	Protease Inhibitor Library	NapSul-Ile-Trp-CHO	Cathepsin L	Wnt Activators Library	CHIR99021	Inhibitor
REDOX	BHT	Phenolic antioxidant	Epigenetics library	Triacetylresveratrol	SIRT1 activator	Autophagy inhibitors library	8-CPT-cAMP·Na	Epac activator	Nuclear Receptor Ligand Library	Acitretin	Retinoid	Protease Inhibitor Library	Pepstatin A	Cathepsin D; Pepsin; Renin	Wnt Activators Library	IM-12	Inhibitor
REDOX	BHA	Phenolic antioxidant	Autophagy inducers library	Rapamycin	mTOR inhibitor	Autophagy inhibitors library	EHNA·HCl	Dynein inhibitor	Nuclear Receptor Ligand Library	Pioglitazone	PPARg agonist	Protease Inhibitor Library	3,4-Dichloroisocoumarin	Granzyme B; Serine proteases	Wnt Activators Library	AR-A014418	Inhibitor
REDOX	Bakuchiol	Phenolic antioxidant	Autophagy inducers library	Timosaponin A-III	mTOR inhib/ER stress	Autophagy inhibitors library	SB-216763	GSK-3b	Nuclear Receptor Ligand Library	4-Hydroxyretinoic acid	Retinoid metabolite	Protease Inhibitor Library	Actinonin	MMPs	Wnt Activators Library	Kenpaullone	Inhibitor
REDOX	DL-α-Lipoic acid	Sulfur-containing antioxidant	Autophagy inducers library	PI-103	Dual PI3K/mTOR inhib	Autophagy inhibitors library	Tolazamide	ATP-K+ channel antagonist	Ion channel ligand library	Antibiotic A-23187	Intracellular calcium	Protease Inhibitor Library	CL-82198·HCl	MMP-13	Wnt Activators Library	Sodium valproate	Inhibitor
REDOX	Eugenol	Phenolic antioxidant	Autophagy inducers library	Lithium Chloride	IMPase inhibitor/GSK-3b inhib	Autophagy inhibitors library	Quinine HCl·2H2O	ATP-K+ channel antagonist	Ion channel ligand library	Ryanodine	Intracellular calcium	Protease Inhibitor Library	Epigallocatechin gallate	MMPs	Wnt Activators Library	BML-284	Unknown
REDOX	Melatonin	Nonphenolic antioxidant	Autophagy inducers library	L-690,330	IMPase inhibitor	Autophagy inhibitors library	AICAR	↓Class III PI3K/Beclin1 binding	Ion channel ligand library	Cyclopiazonic acid	Intracellular calcium	Protease Inhibitor Library	GM 6001	MMPs	Wnt Activators Library	Sodium Deoxycholic acid	Unknown
REDOX	N-Acetyl-Cysteine	Thiol-containing reducing agent	Autophagy inducers library	Sodium Valproate	↓IP3 via ↓inositol synth	Autophagy inhibitors library	PD-98059	ERK pathway activator	Ion channel ligand library	Gingerol	Intracellular calcium	Protease Inhibitor Library	NNGH	MMPs	Wnt Activators Library	Resveratrol	Increase / Decrease
REDOX	D-γ-Tocopherol	Phenolic antioxidant	Autophagy inducers library	Verapamil·HCl	Ca2+ Blocker	Autophagy inhibitors library	Anisomycin	p38 MAPK activator	Ion channel ligand library	Thapsigargin	Intracellular calcium	Protease Inhibitor Library	Gliotoxin	Proteasome	Wnt Activators Library	PGE2	Unknown
REDOX	Tocopherol succinate	Phenolic antioxidant	Autophagy inducers library	Loperamide·HCl	Ca2+ Blocker	Autophagy inhibitors library	Cycloheximide	protein synthesis(CMA)	Ion channel ligand library	TMB-8·HCl	Intracellular calcium	Protease Inhibitor Library	MG-132	Proteasome	Wnt Activators Library	WAY-262611	Inhibitor
REDOX	Ascorbic acid	Ascorbate-type antioxidant	Autophagy inducers library	Amiodarone·HCl	Ca2+ Blocker/mTORC1 inhib.	Autophagy inhibitors library	Pifithrin-µ	HSP70 inhibitor	Ion channel ligand library	Dantrolene	Intracellular calcium	Protease Inhibitor Library	AAF-CMK	Tripeptidyl peptidase II	Wnt Activators Library	Purpurogallin	Inhibitor
REDOX	Ascorbyl palmitate	Lipohilic ascorbate	Autophagy inducers library	Nimodipine	Ca2+ Blocker	Autophagy inhibitors library	Nocodazole	Inhibits autophagosome/lysosome fusion; Microtubule depolymerization	Ion channel ligand library	Amiloride·HCl	Calcium channel	Protease Inhibitor Library	PMSF	Serine proteases	Wnt Activators Library	Exifone	Inhibitor
REDOX	n-Octyl caffeate	Phenolic antioxidant	Autophagy inducers library	Nitrendipine	Ca2+ Blocker	Nuclear Receptor Ligand Library	25-Hydroxyvitamin D3	VDR agonist	Ion channel ligand library	Benzamil	Calcium channel	Protease Inhibitor Library	Bestatin·HCl	Aminopeptidases	Wnt Activators Library	Gallic acid	Inhibitor
REDOX	Paeonol	Phenolic antioxidant	Autophagy inducers library	Niguldipine	Ca2+ Blocker(T-type)	Nuclear Receptor Ligand Library	Retinoic acid, all trans	RAR agonist	Ion channel ligand library	(R)-(+)-Bay K 8644	Calcium channel	Protease Inhibitor Library	Boc-Gly-Val-Val-CHO	gamma-secretase	Wnt Activators Library	Riluzole	Inhibitor
REDOX	Protocatechuic acid	Phenolic antioxidant	Autophagy inducers library	Penitrem A	Ca2+/K+ channel blocker	Nuclear Receptor Ligand Library	9-cis Retinoic acid	RXR agonist	Ion channel ligand library	Diltiazem·HCl	Calcium channel	Protease Inhibitor Library	Captopril	Angiotensin-converting enzyme	Wnt Activators Library	LY456236·HCl	Inhibitor
REDOX	Glutathione	Thiol-containing reducing agent	Autophagy inducers library	Ionomycin	Ca2+ ionophore	Nuclear Receptor Ligand Library	13-cis Retinoic acid	RAR agonist	Ion channel ligand library	L-(-)-cis-Diltiazem·HCl	Calcium channel	Protease Inhibitor Library	Elastatinal	Neutrophil elastase; Rhinovirus 2A proteinase	Wnt Activators Library	(-)-Terreic acid	Inhibitor
REDOX	Carvedilol	Unknown	Autophagy inducers library	Rotenone	mETC-complex1-inhib	Nuclear Receptor Ligand Library	4-Hydroxyphenylretinamide	RAR agonist	Ion channel ligand library	Flunarizine·2HCl	Calcium channel	Protease Inhibitor Library	Phosphoramidon	Neutral endopeptidase 24.11; Endothelin-converting enzyme	Wnt Activators Library	Forskolin	Activator
REDOX	Diludin	Dihydropyridine-type antioxidant	Autophagy inducers library	TTFA	mETC-complex2-inhib	Nuclear Receptor Ligand Library	AM-580	RARa agonist	Ion channel ligand library	FPL-64176	Calcium channel	Protease Inhibitor Library	PPACK	Thrombin	Wnt Activators Library	GW9662	Inhibitor
REDOX	Carnosic acid	Phenolic antioxidant	Autophagy inducers library	Fluspirilene	Dopamine antagonist	Nuclear Receptor Ligand Library	TTNPB	RAR agonist	Ion channel ligand library	Nifedipine	Calcium channel	Protease Inhibitor Library	Z-Prolyl-prolinal	Prolyl endopeptidase	Wnt Inhibitors Library	Box5	Antagonist
REDOX	Tanshinone IIA	1,2-Quinone antioxidant	Autophagy inducers library	Trifluoperazine·2HCl	Dopamine antagonist	Nuclear Receptor Ligand Library	Methoprene acid	RXR agonist	Ion channel ligand library	Nimodipine	Calcium channel	Protease Inhibitor Library	DL-Thiorphan	Neutral endopeptidase 24.11; Endothelin-converting enzyme	Wnt Inhibitors Library	TNP-470	Inhibitor
REDOX	Probucol	Phenolic antioxidant	Autophagy inducers library	Sorafenib tosylate	PDGFR3/FLT3/ER Stress	Nuclear Receptor Ligand Library	WY-14643	PPAR agonist	Ion channel ligand library	Nitrendipine	Calcium channel	Protease Inhibitor Library	TLCK·HCl	Trypsin- like serine proteases	Wnt Inhibitors Library	IWR-1	Stabilizer
REDOX	EPA	Polyunsaturated radical scavenger	Autophagy inducers library	Niclosamide	mTORC1 inhib	Nuclear Receptor Ligand Library	Ciglitazone	PPARg agonist	Ion channel ligand library	Amlodipine	Calcium channel	Protease Inhibitor Library	TPCK	Chymotrypsin-like serine proteases	Wnt Inhibitors Library	XAV939	Stabilizer / Inhibitor
REDOX	DCHA	Polyunsaturated radical scavenger	Autophagy inducers library	Rottlerin	mTORC1 inhib	Nuclear Receptor Ligand Library	Tetradecylthioacetic acid	PPAR agonist	Ion channel ligand library	SKF-96365	Calcium channel	Protease Inhibitor Library	BML-244	Cathepsin K	Wnt Inhibitors Library	IWP-2	Inhibitor
REDOX	bis-demethoxycurcumin	Phenolic antioxidant	Autophagy inducers library	Caffeine	mTor pathway inhibition	Nuclear Receptor Ligand Library	5,8,11,14-Eicosatetraynoic acid	PPARa agonist	Ion channel ligand library	Tetrandrine	Calcium channel	Protease Inhibitor Library	Fumagillin	Met AP-2	Wnt Inhibitors Library	Bafilomycin A1	Inhibitor
REDOX	Ibuproxam	Metal chelator	Autophagy inducers library	Metformin·HCl	mTORC1 inhib RAG/GTPase	Nuclear Receptor Ligand Library	6-Formylindolo [3,2-B] carbazole	AHR agonist	Ion channel ligand library	(±)-Verapamil·HCl	Calcium channel	Protease Inhibitor Library	5-Nitroisatin	Caspase - 3 inhibitor	Wnt Inhibitors Library	Sulindac Sulfide	Suppression Wnt target gene
REDOX	Ciclopirox ethanolamine	Hydroxyl radical scavenger	Autophagy inducers library	Clonidine·HCl	I1R agonist, ↓cAMP	Nuclear Receptor Ligand Library	Diindolylmethane	AHR agonist	Ion channel ligand library	Methoxyverapamil	Calcium channel	Protease Inhibitor Library	P32/98 hemifumarate salt	DPP IV	Wnt Inhibitors Library	Celecoxib	Suppression Wnt target gene
REDOX	Thymoquinone	Quinone antioxidant	Autophagy inducers library	Rilmenidine	I1R agonist, ↓cAMP	Nuclear Receptor Ligand Library	Acetyl-S-farnesyl-L-cysteine	Farnesoid	Ion channel ligand library	Bepridil	Calcium channel	Protease Inhibitor Library	Nafamostat mesylate	Tryptase	Wnt Inhibitors Library	Diclofenac·Na	Suppression Wnt target gene
REDOX	Thiourea	Thiol-containing reducing agent	Autophagy inducers library	2',5'-Dideoxyadenosine	adenylyl cyclase inhib., ↓cAMP	Nuclear Receptor Ligand Library	S-Farnesyl-L-cysteine methyl ester	Farnesoid	Ion channel ligand library	Amiodarone	Calcium channel	Protease Inhibitor Library	Gabexate mesylate	Serine proteases	Wnt Inhibitors Library	Niclosamide	Internalization / Downregulation
REDOX	DTT	Thiol-containing reducing agent	Autophagy inducers library	Suramin·6Na	Gas inhibitor	Nuclear Receptor Ligand Library	N-Acetyl-S-geranygeranyl-L-cysteine	Farnesoid	Ion channel ligand library	YS035	Calcium channel	Protease Inhibitor Library	Dec-RVKR-CMK	Furin	Wnt Inhibitors Library	ICG-001	Inhibitor
REDOX	N-Ethylmaleimide	Thiol trap	Autophagy inducers library	Pimozide	D1,D2,D3 adrenergic blocker	Nuclear Receptor Ligand Library	AGC (Acetyl-geranyl-cysteine)	Farnesoid	Ion channel ligand library	Niguldipine	Calcium channel	Protease Inhibitor Library	Z-PLG-NHOH	MMPs	Wnt Inhibitors Library	Harmine·HCl	Inhibitor
REDOX	Buthionine sulfoximine	Glutathione biosynthesis inhibitor	Autophagy inducers library	STF-62247	trans golgi network	Nuclear Receptor Ligand Library	Farnesylthioacetic acid	Farnesoid	Ion channel ligand library	Nicardipine·HCl	Calcium channel	Protease Inhibitor Library	Z-FA-FMK	Cathepsins B, L, S	Wnt Inhibitors Library	Curcumin	Inhibitor
REDOX	Anethole trithione	Sulfur-containing antioxidant	Autophagy inducers library	Spermidine	↓HATs	Nuclear Receptor Ligand Library	Bezafibrate	PPARa agonist	Ion channel ligand library	Pimozide	Calcium channel	Protease Inhibitor Library	Z-VAD-FMK	Caspase Pan specific	Wnt Inhibitors Library	PNU-74654	Inhibitor
REDOX	TEMPO	Nitroxyl radical	Autophagy inducers library	FK-866	↓NAD	Nuclear Receptor Ligand Library	LY 171883	PPAR g agonist	Ion channel ligand library	Loperamide·HCl	Calcium channel	Protease Inhibitor Library	AEBSF·HCl	Serine protease	Wnt Inhibitors Library	Quercetin	Inhibitor
REDOX	D609	Antioxidant	Autophagy inducers library	Tamoxifen citrate	↑Ceramide	Nuclear Receptor Ligand Library	15-Deoxy-D12,14-prostaglandin J2	PPARg agonist	Ion channel ligand library	(±)-U-50488	Calcium channel	Protease Inhibitor Library	Apstatin	Aminopeptidase P	Wnt Inhibitors Library	BML285 (Diaminoquinazoline)	Inhibitor
REDOX	Captopril	Unknown	Autophagy inducers library	Minoxidil	K+ channel opener	Nuclear Receptor Ligand Library	Troglitazone	PPARg agonist	Ion channel ligand library	Dichlorobenzamil	Calcium channel	Protease Inhibitor Library	Argatroban	Thrombin	Wnt Inhibitors Library	NO-ASA	Inhibitor
REDOX	Disulfiram	Sulfur-containing antioxidant	Autophagy inducers library	Imiquimod	TLR7	Nuclear Receptor Ligand Library	CITCO	CAR agonist	Ion channel ligand library	U-37883A·HCl	Potassium channel	Protease Inhibitor Library	URB-597	Amidase inhibitor	Wnt Inhibitors Library	FH-535	Inhibitor
REDOX	1,2-Dithiole-3-thione	Sulfur-containing antioxidant	Autophagy inducers library	Imatinib mesylate	Tyrosine kinase inhib.	Nuclear Receptor Ligand Library	Paxilline	LXR agonist	Ion channel ligand library	E-4031	Potassium channel	Protease Inhibitor Library	4-Amino-D, L-benzylsuccinic acid	carboxypeptidase inhibitor	Wnt Inhibitors Library	Val-Val-Val	Inhibitor
REDOX	Selenomethionine	Selenium-containing antioxidant	Autophagy inducers library	AG112	Tyrosine kinase inhib.	Nuclear Receptor Ligand Library	24(S)-Hydroxycholesterol	LXR agonist	Ion channel ligand library	Diazoxide	Potassium channel	Protease Inhibitor Library	N-Ethylmaleimide	Cysteine proteases	Wnt Inhibitors Library	BML286 (3289-8625)	Inhibitor
REDOX	Tetramethylpyrazine	Nonphenolic antioxidant	Autophagy inducers library	SU11652	Tyrosine kinase inhib.	Nuclear Receptor Ligand Library	24(S),25-Epoxycholesterol	LXR agonist	Ion channel ligand library	Glyburide	Potassium channel	Protease Inhibitor Library	Acivicin	Gamma glutamyl transpeptidase inhibitor	Wnt Inhibitors Library	Sulindac	Inhibitor
REDOX	Ethoxyquin	Nonphenolic antioxidant	Autophagy inducers library	SB202190	p38 MAPK inhibitor	Nuclear Receptor Ligand Library	Pregnenolone-16(alpha)-carbonitrile	PXR/SXR agonist	Ion channel ligand library	5-Hydroxydecanoic acid	Potassium channel	Protease Inhibitor Library	Tazobactam	Beta-lactamase inhibitor antibacterial	Wnt Inhibitors Library	EGCG	Induction
REDOX	Canthaxanthin	Polyunsaturated radical scavenger	Autophagy inducers library	Brefeldin A	ER stress	Nuclear Receptor Ligand Library	Carbacyclin	PPARd agonist	Ion channel ligand library	Minoxidil sulfate	Potassium channel	Protease Inhibitor Library	Lisinopril	Angiotensin converting enzyme	Wnt Inhibitors Library	Imatinib mesylate	Inhibitor
REDOX	β-carotene	Polyunsaturated radical scavenger	Autophagy inducers library	Tunicamycin	ER Stress	Nuclear Receptor Ligand Library	Clofibric acid	PPARa agonist	Ion channel ligand library	Paxilline	Potassium channel	Protease Inhibitor Library	Enalapril	Angiotensin converting enzyme	Wnt Inhibitors Library	Troglitazone	Agonist / Inhibition of β-catenin
REDOX	Retinyl palmitate	Polyunsaturated radical scavenger	Autophagy inducers library	Thapsigargin	ER Stress/SERCA inhib.	Nuclear Receptor Ligand Library	BADGE	PPARg antagonist	Ion channel ligand library	PCO-400	Potassium channel	Protease Inhibitor Library	Cilastatin	Dipeptidase	Wnt Inhibitors Library	Rosiglitazone maleate	Agonist / Inhibition of β-catenin
															Wnt Inhibitors Library	Cardamonin	Inhibitor
Epigenetics library	Trichostatin A	HDAC inhibitor													Wnt Inhibitors Library	CCT036477	Inhibitor
Epigenetics library	2,4-Pyridinedicarboxylic Acid	Histone demethylase inhibitor													Wnt Inhibitors Library	Bosutinib (SKI-606)	Inhibitor
Epigenetics library	Garcinol	HAT inhibitor													Wnt Inhibitors Library	Carnosol	Inhibitor
Epigenetics library	Splitomicin	SIRT-2 inhibitor													Wnt Inhibitors Library	Flavanone	Inhibitor
Epigenetics library	BML-210	HDAC inhibitor													Wnt Inhibitors Library	Retinoic Acid	Inhibitor
Epigenetics library	Apicidin	HDAC inhibitor													Wnt Inhibitors Library	Pterostilbene	Decrease
Epigenetics library	Suberoyl bis-hydroxamic acid	HDAC inhibitor													Wnt Inhibitors Library	Hexachlorophene	Activation / Repression
Epigenetics library	Scriptaid	HDAC inhibitor													Wnt Inhibitors Library	DHA	Induction
Epigenetics library	Nullscript	Scriptaid Neg control													Wnt Inhibitors Library	EPA	Induction
Epigenetics library	5-Aza-2'-deoxycytidine	DNA Me transferase inhibitor													Wnt Inhibitors Library	JS-K	Degradation via NO
Epigenetics library	Zebularine	DNA Me transferase inhibitor													Wnt Inhibitors Library	1151.39	Activator
Epigenetics library	SAHA	HDAC inhibitor													Wnt Inhibitors Library	Apigenin	Inhibitor
Epigenetics library	Isonicotinamide	nicotinamide antagonist													Wnt Inhibitors Library	Ellagic Acid	Inhibitor
Epigenetics library	ITSA-1	Inhibitor of TSA activity													Wnt Inhibitors Library	D4476	Inhibitor
Epigenetics library	Phenylbutyrate·Na	HDAC inhibitor													Wnt Inhibitors Library	Trichostatin A	Reversal epigenetic silencing
Epigenetics library	Tranylcypromine hemisulfate	Lysine demethylase inhibitor													Wnt Inhibitors Library	5-Aza-2-deoxycytidine(Decitabine)	Reversal epigenetic silencing
Epigenetics library	Valproic acid	HDAC inhibitor													Wnt Inhibitors Library	Thalidomide	Upregulation
Epigenetics library	EX-527	SIRT1 inhibitor													Wnt Inhibitors Library	Genistein	Inhibitor
Epigenetics library	Resveratrol	SIRT1 activator													Wnt Inhibitors Library	PP2	Inhibitor
Epigenetics library	M-344	HDAC inhibitor													Wnt Inhibitors Library	NCI16221	Unknown
Epigenetics library	Nicotinamide	SIRT inhibitor													Wnt Inhibitors Library	Doxorubicin·HCl (3013-0085)	Unknown
Epigenetics library	BML-266	SIRT2 inhibitor													Wnt Inhibitors Library	3253-5986	Unknown
Epigenetics library	Piceatannol	SIRT activator													Wnt Inhibitors Library	Usnic acid	Unknown
Epigenetics library	Fluoro-SAHA	HDAC inhibitor
Epigenetics library	Valproic acid hydroxamate	HDAC inhibitor
Epigenetics library	AGK2	SIRT2 inhibitor
Epigenetics library	Salermide	SIRT inhibitor
Epigenetics library	MC-1293	HDAC inhibitor
Epigenetics library	Anacardic acid	HAT inhibitor
Epigenetics library	B2	SIRT2 inhibitor
Epigenetics library	BIX-01294	Histone methyl transferase inhibitor
Epigenetics library	Butyrolactone 3	HAT inhibitor
Epigenetics library	CTPB	HAT inhibitor
Epigenetics library	Oxamflatin	HDAC inhibitor
Epigenetics library	Sirtinol	SIRT inhibitor
Epigenetics library	Suramin·6Na	SIRT1 inhibitor
Epigenetics library	BML-278	SIRT1 actvator
Epigenetics library	NCH-51	HDAC inhibitor
Epigenetics library	CI-994	HDAC inhibitor
Epigenetics library	NSC-3852	HDAC inhibitor
Epigenetics library	Aminoresveratrol sulfate	SIRT1 activator
Epigenetics library	BML-281	HDAC-6 inhibitor
Epigenetics library	Triacetylresveratrol	SIRT1 activator
Autophagy inducers library	Rapamycin	mTOR inhibitor
Autophagy inducers library	Timosaponin A-III	mTOR inhib/ER stress
Autophagy inducers library	PI-103	Dual PI3K/mTOR inhib
Autophagy inducers library	Lithium Chloride	IMPase inhibitor/GSK-3b inhib
Autophagy inducers library	L-690,330	IMPase inhibitor
Autophagy inducers library	Sodium Valproate	↓IP3 via ↓inositol synth
Autophagy inducers library	Verapamil·HCl	Ca2+ Blocker
Autophagy inducers library	Loperamide·HCl	Ca2+ Blocker
Autophagy inducers library	Amiodarone·HCl	Ca2+ Blocker/mTORC1 inhib.
Autophagy inducers library	Nimodipine	Ca2+ Blocker
Autophagy inducers library	Nitrendipine	Ca2+ Blocker
Autophagy inducers library	Niguldipine	Ca2+ Blocker(T-type)
Autophagy inducers library	Penitrem A	Ca2+/K+ channel blocker
Autophagy inducers library	Ionomycin	Ca2+ ionophore
Autophagy inducers library	Rotenone	mETC-complex1-inhib
Autophagy inducers library	TTFA	mETC-complex2-inhib
Autophagy inducers library	Fluspirilene	Dopamine antagonist
Autophagy inducers library	Trifluoperazine·2HCl	Dopamine antagonist
Autophagy inducers library	Sorafenib tosylate	PDGFR3/FLT3/ER Stress
Autophagy inducers library	Niclosamide	mTORC1 inhib
Autophagy inducers library	Rottlerin	mTORC1 inhib
Autophagy inducers library	Caffeine	mTor pathway inhibition
Autophagy inducers library	Metformin·HCl	mTORC1 inhib RAG/GTPase
Autophagy inducers library	Clonidine·HCl	I1R agonist, ↓cAMP
Autophagy inducers library	Rilmenidine	I1R agonist, ↓cAMP
Autophagy inducers library	2',5'-Dideoxyadenosine	adenylyl cyclase inhib., ↓cAMP
Autophagy inducers library	Suramin·6Na	Gas inhibitor
Autophagy inducers library	Pimozide	D1,D2,D3 adrenergic blocker
Autophagy inducers library	STF-62247	trans golgi network
Autophagy inducers library	Spermidine	↓HATs
Autophagy inducers library	FK-866	↓NAD
Autophagy inducers library	Tamoxifen citrate	↑Ceramide
Autophagy inducers library	Minoxidil	K+ channel opener
Autophagy inducers library	Imiquimod	TLR7
Autophagy inducers library	Imatinib mesylate	Tyrosine kinase inhib.
Autophagy inducers library	AG112	Tyrosine kinase inhib.
Autophagy inducers library	SU11652	Tyrosine kinase inhib.
Autophagy inducers library	SB202190	p38 MAPK inhibitor
Autophagy inducers library	Brefeldin A	ER stress
Autophagy inducers library	Tunicamycin	ER Stress
Autophagy inducers library	Thapsigargin	ER Stress/SERCA inhib.
Autophagy inducers library	A23187	ER stress
Autophagy inducers library	Capsaicin	ER stress/p38,ERK inhib
Autophagy inducers library	Dihydrocapsaicin	ROS accumulation
Autophagy inducers library	Glucosamine HCl	mTOR
Autophagy inducers library	DTT	ER stress inducer/lysosome degrad. Inhib.
Autophagy inducers library	Deoxycholate·Na	↑Beclin1 via ER stress/DNA damage
Autophagy inducers library	ABC294640·HCl	SK2 inhib.
Autophagy inducers library	Licochalcone A	Bcl-2/mTOR inhib.
Autophagy inducers library	Curcumin	Akt/mTOR/S6K path inhib.
Autophagy inducers library	Plumbagin	Akt/mTOR inhib.
Autophagy inducers library	6-Gingerol	ROS induction
Autophagy inducers library	Akt Inhibitor X·HCl	Akt Inhibitor
Autophagy inducers library	PMSF	Protease Inhibitor
Autophagy inducers library	MG132	Proteasome inhibitor
Autophagy inducers library	ALLN	Proteasome inhibitor
Autophagy inducers library	7-Ketocholesterol	Mitochondrial stress
Autophagy inducers library	17-AAG	Hsp90 inhibitor
Autophagy inducers library	Geldanamycin	Hsp90 inhibitor
Autophagy inducers library	C1	ROS/non-Beclin1 dependent
Autophagy inducers library	Z36	Bcl-XL inhibitor
Autophagy inducers library	Rockout	Rho kinase Inhibitor
Autophagy inducers library	Go6850	PKC Inhibitor
Autophagy inducers library	2-Deoxyglucose	Blocks glycolysis
Autophagy inducers library	Etoposide	Topoisomerase II Inhibitor
Autophagy inducers library	SMER28	Increases autophagosome clearance independent of mTOR
Autophagy inducers library	Trehalose	Increases Beclin-1 and autophagins independent of mTOR
Autophagy inducers library	C2-dihydroceramide	Induces formation of autophagosomes
Autophagy inducers library	Temozolomide	Localizes LC3 to autophagosomes
Autophagy inducers library	Resveratrol	Inhibits S6 kinase
Autophagy inducers library	Staurosporine	Apoptosis control
Autophagy inhibitors library	Bafilomycin A1	V-ATPase inhib
Autophagy inhibitors library	3-Methyladenine	PI3K inhib
Autophagy inhibitors library	LY294002	PI3K inhib
Autophagy inhibitors library	Wortmannin	PI3K inhib
Autophagy inhibitors library	SP600125	JNK inhib.
Autophagy inhibitors library	Chloroquine	Lysosomes (pH ↑)
Autophagy inhibitors library	Hydroxychloroquine	Lysosomes (pH ↑)
Autophagy inhibitors library	Norclomipramine·HCl	Lysosomes (pH ↑)
Autophagy inhibitors library	(±)Bay K8644	L-type Ca2+ agonist
Autophagy inhibitors library	Forskolin	adenylyl cyclase activator
Autophagy inhibitors library	Dibutyryl cAMP·Na	cAMP agonist
Autophagy inhibitors library	Rolipram	PDE4 Inhibitor(↑cAMP)
Autophagy inhibitors library	8-CPT-cAMP·Na	Epac activator
Autophagy inhibitors library	EHNA·HCl	Dynein inhibitor
Autophagy inhibitors library	SB-216763	GSK-3b
Autophagy inhibitors library	Tolazamide	ATP-K+ channel antagonist
Autophagy inhibitors library	Quinine HCl·2H2O	ATP-K+ channel antagonist
Autophagy inhibitors library	AICAR	↓Class III PI3K/Beclin1 binding
Autophagy inhibitors library	PD-98059	ERK pathway activator
Autophagy inhibitors library	Anisomycin	p38 MAPK activator
Autophagy inhibitors library	Cycloheximide	protein synthesis(CMA)
Autophagy inhibitors library	Pifithrin-µ	HSP70 inhibitor
Autophagy inhibitors library	Nocodazole	Inhibits autophagosome/lysosome fusion; Microtubule depolymerization
Nuclear Receptor Ligand Library	25-Hydroxyvitamin D3	VDR agonist
Nuclear Receptor Ligand Library	Retinoic acid, all trans	RAR agonist
Nuclear Receptor Ligand Library	9-cis Retinoic acid	RXR agonist
Nuclear Receptor Ligand Library	13-cis Retinoic acid	RAR agonist
Nuclear Receptor Ligand Library	4-Hydroxyphenylretinamide	RAR agonist
Nuclear Receptor Ligand Library	AM-580	RARa agonist
Nuclear Receptor Ligand Library	TTNPB	RAR agonist
Nuclear Receptor Ligand Library	Methoprene acid	RXR agonist
Nuclear Receptor Ligand Library	WY-14643	PPAR agonist
Nuclear Receptor Ligand Library	Ciglitazone	PPARg agonist
Nuclear Receptor Ligand Library	Tetradecylthioacetic acid	PPAR agonist
Nuclear Receptor Ligand Library	5,8,11,14-Eicosatetraynoic acid	PPARa agonist
Nuclear Receptor Ligand Library	6-Formylindolo [3,2-B] carbazole	AHR agonist
Nuclear Receptor Ligand Library	Diindolylmethane	AHR agonist
Nuclear Receptor Ligand Library	Acetyl-S-farnesyl-L-cysteine	Farnesoid
Nuclear Receptor Ligand Library	S-Farnesyl-L-cysteine methyl ester	Farnesoid
Nuclear Receptor Ligand Library	N-Acetyl-S-geranygeranyl-L-cysteine	Farnesoid
Nuclear Receptor Ligand Library	AGC (Acetyl-geranyl-cysteine)	Farnesoid
Nuclear Receptor Ligand Library	Farnesylthioacetic acid	Farnesoid
Nuclear Receptor Ligand Library	Bezafibrate	PPARa agonist
Nuclear Receptor Ligand Library	LY 171883	PPAR g agonist
Nuclear Receptor Ligand Library	15-Deoxy-D12,14-prostaglandin J2	PPARg agonist
Nuclear Receptor Ligand Library	Troglitazone	PPARg agonist
Nuclear Receptor Ligand Library	CITCO	CAR agonist
Nuclear Receptor Ligand Library	Paxilline	LXR agonist
Nuclear Receptor Ligand Library	24(S)-Hydroxycholesterol	LXR agonist
Nuclear Receptor Ligand Library	24(S),25-Epoxycholesterol	LXR agonist
Nuclear Receptor Ligand Library	Pregnenolone-16(alpha)-carbonitrile	PXR/SXR agonist
Nuclear Receptor Ligand Library	Carbacyclin	PPARd agonist
Nuclear Receptor Ligand Library	Clofibric acid	PPARa agonist
Nuclear Receptor Ligand Library	BADGE	PPARg antagonist
Nuclear Receptor Ligand Library	GW 9662	PPARg antagonist
Nuclear Receptor Ligand Library	Gemfibrozil	PPARa agonist
Nuclear Receptor Ligand Library	GW 7647	PPARa agonist
Nuclear Receptor Ligand Library	3,5-Diiodo-L-thyronine	THR agonist
Nuclear Receptor Ligand Library	3,5-Diiodo-L-tyrosine	THR congener
Nuclear Receptor Ligand Library	all-trans-Retinol	Retinoid
Nuclear Receptor Ligand Library	13-cis-Retinol	Retinoid
Nuclear Receptor Ligand Library	Retinyl acetate	Retinoid
Nuclear Receptor Ligand Library	3,5-Diiodo-4-hydroxyphenylpropionic acid	THR agonist
Nuclear Receptor Ligand Library	Cholic acid	FXR agonist
Nuclear Receptor Ligand Library	Deoxycholic acid	FXR agonist
Nuclear Receptor Ligand Library	Chenodeoxycholic acid	FXR agonist
Nuclear Receptor Ligand Library	Glycocholic acid	Cholesterol metabolite
Nuclear Receptor Ligand Library	Glycodeoxycholic acid	Cholesterol metabolite
Nuclear Receptor Ligand Library	Taurocholic acid	Cholesterol metabolite
Nuclear Receptor Ligand Library	Taurodeoxycholic acid	Cholesterol metabolite
Nuclear Receptor Ligand Library	Rifampicin	PXR agonist
Nuclear Receptor Ligand Library	Dexamethasone	GR agonist
Nuclear Receptor Ligand Library	Lithocholic acid	Cholesterol metabolite
Nuclear Receptor Ligand Library	5b-Pregnan-3,20-dione	PXR agonist
Nuclear Receptor Ligand Library	Adapalene	Retinoic acid analog
Nuclear Receptor Ligand Library	Farnesol	Farnesoid
Nuclear Receptor Ligand Library	3a, 5a-Androstenol	CAR inverse agonist
Nuclear Receptor Ligand Library	3α, 5α-Androstanol	CAR inverse agonist
Nuclear Receptor Ligand Library	Z-Guggulsterone	FXR antagonist
Nuclear Receptor Ligand Library	TCPOBOP	CAR agonist
Nuclear Receptor Ligand Library	N-Oleoylethanolamide	PPARa agonist
Nuclear Receptor Ligand Library	GW4064	FXR agonist
Nuclear Receptor Ligand Library	Geranylgeraniol	Farnesoid
Nuclear Receptor Ligand Library	6a-Fluorotestosterone	TR agonist
Nuclear Receptor Ligand Library	Tamoxifen	ER antagonist
Nuclear Receptor Ligand Library	Mifepristone	PR antagonist
Nuclear Receptor Ligand Library	Estrone	ER agonist
Nuclear Receptor Ligand Library	13(S)-Hydroxy-9Z,11E-octadecadienoic acid	PPARg agonist
Nuclear Receptor Ligand Library	Cortisone	GR agonist
Nuclear Receptor Ligand Library	Progesterone	PR agonist
Nuclear Receptor Ligand Library	17b-Estradiol	ER agonist
Nuclear Receptor Ligand Library	Pregnenolone	Progesterone precursor
Nuclear Receptor Ligand Library	Androstenedione	Testosterone precursor
Nuclear Receptor Ligand Library	1a,25-Dihydroxyvitamin D3	VDR agonist
Nuclear Receptor Ligand Library	Docosa-4Z,7Z,10Z,13Z,16Z,19Z-hexaenoic acid	RXR / FXR agonist
Nuclear Receptor Ligand Library	3-Methylcholanthrene	AHR agonist
Nuclear Receptor Ligand Library	Acitretin	Retinoid
Nuclear Receptor Ligand Library	Pioglitazone	PPARg agonist
Nuclear Receptor Ligand Library	4-Hydroxyretinoic acid	Retinoid metabolite
Ion channel ligand library	Antibiotic A-23187	Intracellular calcium
Ion channel ligand library	Ryanodine	Intracellular calcium
Ion channel ligand library	Cyclopiazonic acid	Intracellular calcium
Ion channel ligand library	Gingerol	Intracellular calcium
Ion channel ligand library	Thapsigargin	Intracellular calcium
Ion channel ligand library	TMB-8·HCl	Intracellular calcium
Ion channel ligand library	Dantrolene	Intracellular calcium
Ion channel ligand library	Amiloride·HCl	Calcium channel
Ion channel ligand library	Benzamil	Calcium channel
Ion channel ligand library	(R)-(+)-Bay K 8644	Calcium channel
Ion channel ligand library	Diltiazem·HCl	Calcium channel
Ion channel ligand library	L-(-)-cis-Diltiazem·HCl	Calcium channel
Ion channel ligand library	Flunarizine·2HCl	Calcium channel
Ion channel ligand library	FPL-64176	Calcium channel
Ion channel ligand library	Nifedipine	Calcium channel
Ion channel ligand library	Nimodipine	Calcium channel
Ion channel ligand library	Nitrendipine	Calcium channel
Ion channel ligand library	Amlodipine	Calcium channel
Ion channel ligand library	SKF-96365	Calcium channel
Ion channel ligand library	Tetrandrine	Calcium channel
Ion channel ligand library	(±)-Verapamil·HCl	Calcium channel
Ion channel ligand library	Methoxyverapamil	Calcium channel
Ion channel ligand library	Bepridil	Calcium channel
Ion channel ligand library	Amiodarone	Calcium channel
Ion channel ligand library	YS035	Calcium channel
Ion channel ligand library	Niguldipine	Calcium channel
Ion channel ligand library	Nicardipine·HCl	Calcium channel
Ion channel ligand library	Pimozide	Calcium channel
Ion channel ligand library	Loperamide·HCl	Calcium channel
Ion channel ligand library	(±)-U-50488	Calcium channel
Ion channel ligand library	Dichlorobenzamil	Calcium channel
Ion channel ligand library	U-37883A·HCl	Potassium channel
Ion channel ligand library	E-4031	Potassium channel
Ion channel ligand library	Diazoxide	Potassium channel
Ion channel ligand library	Glyburide	Potassium channel
Ion channel ligand library	5-Hydroxydecanoic acid	Potassium channel
Ion channel ligand library	Minoxidil sulfate	Potassium channel
Ion channel ligand library	Paxilline	Potassium channel
Ion channel ligand library	PCO-400	Potassium channel
Ion channel ligand library	Penitrem A	Potassium channel
Ion channel ligand library	Tolazamide	Potassium channel
Ion channel ligand library	NS-1619	Potassium channel
Ion channel ligand library	ZM226600	Potassium channel
Ion channel ligand library	AM 92016	Potassium channel
Ion channel ligand library	Fluspirilene	Potassium channel
Ion channel ligand library	Minoxidil	Potassium channel
Ion channel ligand library	Tolbutamide	Potassium channel
Ion channel ligand library	Pinacidil H2O	Potassium channel
Ion channel ligand library	4-Aminopyridine	Potassium channel
Ion channel ligand library	Glipizide	Potassium channel
Ion channel ligand library	Phentolamine HCl	Potassium channel
Ion channel ligand library	Quinine HCl 2H2O	Potassium channel
Ion channel ligand library	Flufenamic acid	Potassium channel
Ion channel ligand library	Propafenone	Potassium channel
Ion channel ligand library	QX-314 bromide	Sodium channel
Ion channel ligand library	SDZ-201106	Sodium channel
Ion channel ligand library	Veratridine	Sodium channel
Ion channel ligand library	Phenytoin	Sodium channel
Ion channel ligand library	Grayanotoxin III	Sodium channel
Ion channel ligand library	Aconitine	Sodium channel
Ion channel ligand library	Procainamide·HCl	Sodium channel
Ion channel ligand library	Lidocaine·HCl·H2O	Sodium channel
Ion channel ligand library	Quinidine·HCl·H2O	Sodium channel
Ion channel ligand library	Flecainide acetate	Sodium channel
Ion channel ligand library	Phenamil	Sodium channel
Ion channel ligand library	IAA-94	Misc. channel
Ion channel ligand library	NPPB	Misc. channel
Ion channel ligand library	Fipronil	Misc. channel
Ion channel ligand library	N-phenylanthranilic acid	Misc. channel
Ion channel ligand library	Amantidine·HCl	Misc. channel
Ion channel ligand library	Niflumic acid	Misc. channel
Protease Inhibitor Library	Calpain Inhibitor II (ALLM)	Calpain; Cathepsins L, B
Protease Inhibitor Library	Calpeptin	Calpain; Cathepsin L
Protease Inhibitor Library	E-64	Calpain; Cathepsins; Papain
Protease Inhibitor Library	E-64-C	Calpain; Cathepsins; Papain
Protease Inhibitor Library	E-64-d	Calpain; Cathepsins
Protease Inhibitor Library	MDL-28170	Calpain; Cathepsin B
Protease Inhibitor Library	Z-Leu-Leu-CHO	Calpain
Protease Inhibitor Library	CA-074	Cathepsin B
Protease Inhibitor Library	CA-074 Me	Cathepsin B
Protease Inhibitor Library	NapSul-Ile-Trp-CHO	Cathepsin L
Protease Inhibitor Library	Pepstatin A	Cathepsin D; Pepsin; Renin
Protease Inhibitor Library	3,4-Dichloroisocoumarin	Granzyme B; Serine proteases
Protease Inhibitor Library	Actinonin	MMPs
Protease Inhibitor Library	CL-82198·HCl	MMP-13
Protease Inhibitor Library	Epigallocatechin gallate	MMPs
Protease Inhibitor Library	GM 6001	MMPs
Protease Inhibitor Library	NNGH	MMPs
Protease Inhibitor Library	Gliotoxin	Proteasome
Protease Inhibitor Library	MG-132	Proteasome
Protease Inhibitor Library	AAF-CMK	Tripeptidyl peptidase II
Protease Inhibitor Library	PMSF	Serine proteases
Protease Inhibitor Library	Bestatin·HCl	Aminopeptidases
Protease Inhibitor Library	Boc-Gly-Val-Val-CHO	gamma-secretase
Protease Inhibitor Library	Captopril	Angiotensin-converting enzyme
Protease Inhibitor Library	Elastatinal	Neutrophil elastase; Rhinovirus 2A proteinase
Protease Inhibitor Library	Phosphoramidon	Neutral endopeptidase 24.11; Endothelin-converting enzyme
Protease Inhibitor Library	PPACK	Thrombin
Protease Inhibitor Library	Z-Prolyl-prolinal	Prolyl endopeptidase
Protease Inhibitor Library	DL-Thiorphan	Neutral endopeptidase 24.11; Endothelin-converting enzyme
Protease Inhibitor Library	TLCK·HCl	Trypsin- like serine proteases
Protease Inhibitor Library	TPCK	Chymotrypsin-like serine proteases
Protease Inhibitor Library	BML-244	Cathepsin K
Protease Inhibitor Library	Fumagillin	Met AP-2
Protease Inhibitor Library	5-Nitroisatin	Caspase - 3 inhibitor
Protease Inhibitor Library	P32/98 hemifumarate salt	DPP IV
Protease Inhibitor Library	Nafamostat mesylate	Tryptase
Protease Inhibitor Library	Gabexate mesylate	Serine proteases
Protease Inhibitor Library	Dec-RVKR-CMK	Furin
Protease Inhibitor Library	Z-PLG-NHOH	MMPs
Protease Inhibitor Library	Z-FA-FMK	Cathepsins B, L, S
Protease Inhibitor Library	Z-VAD-FMK	Caspase Pan specific
Protease Inhibitor Library	AEBSF·HCl	Serine protease
Protease Inhibitor Library	Apstatin	Aminopeptidase P
Protease Inhibitor Library	Argatroban	Thrombin
Protease Inhibitor Library	URB-597	Amidase inhibitor
Protease Inhibitor Library	4-Amino-D, L-benzylsuccinic acid	carboxypeptidase inhibitor
Protease Inhibitor Library	N-Ethylmaleimide	Cysteine proteases
Protease Inhibitor Library	Acivicin	Gamma glutamyl transpeptidase inhibitor
Protease Inhibitor Library	Tazobactam	Beta-lactamase inhibitor antibacterial
Protease Inhibitor Library	Lisinopril	Angiotensin converting enzyme
Protease Inhibitor Library	Enalapril	Angiotensin converting enzyme
Protease Inhibitor Library	Cilastatin	Dipeptidase
Protease Inhibitor Library	PKSI-527	Kallikrein
Phosphatase Inhibitor Library	Cantharidic acid	PP1 and PP2A
Phosphatase Inhibitor Library	Cantharidin	PP1 and PP2A
Phosphatase Inhibitor Library	Endothall	PP2A
Phosphatase Inhibitor Library	Benzylphosphonic acid	Tyrosine phosphatases
Phosphatase Inhibitor Library	L-p-Bromotetramisole oxalate	Tyrosine phosphatases
Phosphatase Inhibitor Library	RK-682	Tyrosine phosphatases
Phosphatase Inhibitor Library	RWJ-60475	CD45 tyrosine phosphatase
Phosphatase Inhibitor Library	RWJ-60475 (AM)3	CD45 tyrosine phosphatase (cell permeable)
Phosphatase Inhibitor Library	Levamisole HCl	Mammalian alkaline phosphatase
Phosphatase Inhibitor Library	Tetramisole HCl	Mammalian alkaline phosphatase
Phosphatase Inhibitor Library	Cypermethrin	Calcineurin (PP2B)
Phosphatase Inhibitor Library	Deltamethrin	Calcineurin (PP2B)
Phosphatase Inhibitor Library	Fenvalerate	Calcineurin (PP2B)
Phosphatase Inhibitor Library	Tyrphostin 8	Calcineurin (PP2B)
Phosphatase Inhibitor Library	CinnGel	PTP1B
Phosphatase Inhibitor Library	NSC-95397	Cdc25
Phosphatase Inhibitor Library	BN-82002	Unknown
Phosphatase Inhibitor Library	Shikonin	Unknown
Phosphatase Inhibitor Library	NSC-663284	CDC25
Phosphatase Inhibitor Library	Cyclosporin A	Calcineurin (PP2B)
Phosphatase Inhibitor Library	Pentamidine	PRL1
Phosphatase Inhibitor Library	BVT-948	Tyrosine phosphatases
Phosphatase Inhibitor Library	B4-Rhodanine	PRL3
Phosphatase Inhibitor Library	Alexidine·2HCl	PTPMT1
Phosphatase Inhibitor Library	9,10-Phenanthrenequinone	CD45 tyrosine phosphatase
Phosphatase Inhibitor Library	BML-260	JSP-1
Phosphatase Inhibitor Library	Sanguinarine chloride	PP2C
Phosphatase Inhibitor Library	BML-267	PTP1B
Phosphatase Inhibitor Library	BML-267 Ester	PTP1B (cell permeable)
Phosphatase Inhibitor Library	OBA	Tyrosine phosphatases
Phosphatase Inhibitor Library	OBA Ester	Tyrosine phosphatases (cell permeable)
Phosphatase Inhibitor Library	Gossypol	Calcineurin (PP2B)
Phosphatase Inhibitor Library	Alendronate	Tyrosine phosphatases
Wnt Activators Library	Foxy-5	Agonist
Wnt Activators Library	Anandamide	Activator
Wnt Activators Library	QS-11	Inhibitor
Wnt Activators Library	Diarylsulfonesulfonamide	Inhibitor
Wnt Activators Library	IQ1	Activator
Wnt Activators Library	SB-216763	Inhibitor
Wnt Activators Library	BIO	Inhibitor
Wnt Activators Library	TWS-119	Inhibitor
Wnt Activators Library	CHIR99021	Inhibitor
Wnt Activators Library	IM-12	Inhibitor
Wnt Activators Library	AR-A014418	Inhibitor
Wnt Activators Library	Kenpaullone	Inhibitor
Wnt Activators Library	Sodium valproate	Inhibitor
Wnt Activators Library	BML-284	Unknown
Wnt Activators Library	Sodium Deoxycholic acid	Unknown
Wnt Activators Library	Resveratrol	Increase / Decrease
Wnt Activators Library	PGE2	Unknown
Wnt Activators Library	WAY-262611	Inhibitor
Wnt Activators Library	Purpurogallin	Inhibitor
Wnt Activators Library	Exifone	Inhibitor
Wnt Activators Library	Gallic acid	Inhibitor
Wnt Activators Library	Riluzole	Inhibitor
Wnt Activators Library	LY456236·HCl	Inhibitor
Wnt Activators Library	(-)-Terreic acid	Inhibitor
Wnt Activators Library	Forskolin	Activator
Wnt Activators Library	GW9662	Inhibitor
Wnt Inhibitors Library	Box5	Antagonist
Wnt Inhibitors Library	TNP-470	Inhibitor
Wnt Inhibitors Library	IWR-1	Stabilizer
Wnt Inhibitors Library	XAV939	Stabilizer / Inhibitor
Wnt Inhibitors Library	IWP-2	Inhibitor
Wnt Inhibitors Library	Bafilomycin A1	Inhibitor
Wnt Inhibitors Library	Sulindac Sulfide	Suppression Wnt target gene
Wnt Inhibitors Library	Celecoxib	Suppression Wnt target gene
Wnt Inhibitors Library	Diclofenac·Na	Suppression Wnt target gene
Wnt Inhibitors Library	Niclosamide	Internalization / Downregulation
Wnt Inhibitors Library	ICG-001	Inhibitor
Wnt Inhibitors Library	Harmine·HCl	Inhibitor
Wnt Inhibitors Library	Curcumin	Inhibitor
Wnt Inhibitors Library	PNU-74654	Inhibitor
Wnt Inhibitors Library	Quercetin	Inhibitor
Wnt Inhibitors Library	BML285 (Diaminoquinazoline)	Inhibitor
Wnt Inhibitors Library	NO-ASA	Inhibitor
Wnt Inhibitors Library	FH-535	Inhibitor
Wnt Inhibitors Library	Val-Val-Val	Inhibitor
Wnt Inhibitors Library	BML286 (3289-8625)	Inhibitor
Wnt Inhibitors Library	Sulindac	Inhibitor
Wnt Inhibitors Library	EGCG	Induction
Wnt Inhibitors Library	Imatinib mesylate	Inhibitor
Wnt Inhibitors Library	Troglitazone	Agonist / Inhibition of β-catenin
Wnt Inhibitors Library	Rosiglitazone maleate	Agonist / Inhibition of β-catenin
Wnt Inhibitors Library	Cardamonin	Inhibitor
Wnt Inhibitors Library	CCT036477	Inhibitor
Wnt Inhibitors Library	Bosutinib (SKI-606)	Inhibitor
Wnt Inhibitors Library	Carnosol	Inhibitor
Wnt Inhibitors Library	Flavanone	Inhibitor
Wnt Inhibitors Library	Retinoic Acid	Inhibitor
Wnt Inhibitors Library	Pterostilbene	Decrease
Wnt Inhibitors Library	Hexachlorophene	Activation / Repression
Wnt Inhibitors Library	DHA	Induction
Wnt Inhibitors Library	EPA	Induction
Wnt Inhibitors Library	JS-K	Degradation via NO
Wnt Inhibitors Library	1151.39	Activator
Wnt Inhibitors Library	Apigenin	Inhibitor
Wnt Inhibitors Library	Ellagic Acid	Inhibitor
Wnt Inhibitors Library	D4476	Inhibitor
Wnt Inhibitors Library	Trichostatin A	Reversal epigenetic silencing
Wnt Inhibitors Library	5-Aza-2-deoxycytidine(Decitabine)	Reversal epigenetic silencing
Wnt Inhibitors Library	Thalidomide	Upregulation
Wnt Inhibitors Library	Genistein	Inhibitor
Wnt Inhibitors Library	PP2	Inhibitor
Wnt Inhibitors Library	NCI16221	Unknown
Wnt Inhibitors Library	Doxorubicin·HCl (3013-0085)	Unknown
Wnt Inhibitors Library	3253-5986	Unknown
Wnt Inhibitors Library	Usnic acid	Unknown
